# Supplementary material for: Chemical-substitution-induced successive symmetry descent and structure–property correlation for “114” oxides CaBa1−xSrxZn2Al2O7
Source: Royal Society of Chemistry journal article supplement (doi:10.1039/c9dt04566j), 2020-01-01
Supplement: c9dt04566j1.pdf [file c9dt04566j1.pdf]

Supporting Information for

**Chemical-Substitution-Induced Successive Symmetry Descent and  
Structure-Property Correlation Investigation for “114” Oxides  $\text{CaBa}_{1-x}\text{Sr}_x\text{Zn}_2\text{Al}_2\text{O}_7$**

Yuling An,<sup>a</sup> Pengfei Jiang,<sup>\*a,b</sup> Wenliang Gao,<sup>a</sup> Rihong Cong,<sup>a</sup> Tao Yang<sup>\*a</sup>

<sup>a</sup> College of Chemistry and Chemical Engineering, Chongqing University, Chongqing, 401331,  
People's Republic of China

<sup>b</sup> College of Physics, Chongqing University, Chongqing, 401331, People's Republic of China

\* Corresponding authors: pengfeijiang@cqu.edu.cn; taoyang@cqu.edu.cn.

Table S1. Comparison of reliable factors and isotropic thermal factors for  $\text{CaBa}_{1-x}\text{Sr}_x\text{Zn}_2\text{Al}_2\text{O}_7$  ( $x = 0.2, 0.4, \text{ and } 0.6$ ) refined with different structure models.

| Refinement Models                         | $\text{CaBa}_{0.8}\text{Sr}_{0.2}\text{Zn}_2\text{Al}_2\text{O}_7$ |                          |              | $\text{CaBa}_{0.6}\text{Sr}_{0.4}\text{Zn}_2\text{Al}_2\text{O}_7$ |                          |              | $\text{CaBa}_{0.4}\text{Sr}_{0.6}\text{Zn}_2\text{Al}_2\text{O}_7$ |                          |              |
|-------------------------------------------|--------------------------------------------------------------------|--------------------------|--------------|--------------------------------------------------------------------|--------------------------|--------------|--------------------------------------------------------------------|--------------------------|--------------|
|                                           | $P6_3mc$ model                                                     | Splitting $P6_3mc$ model | $P31c$ model | $P6_3mc$ model                                                     | Splitting $P6_3mc$ model | $P31c$ model | $P6_3mc$ model                                                     | Splitting $P6_3mc$ model | $P31c$ model |
| $R_{\text{wp}}$ (%)                       | 4.79                                                               | 4.48                     | 4.53         | 5.25                                                               | 4.72                     | 4.79         | 6.60                                                               | 5.83                     | 5.70         |
| $R_p$ (%)                                 | 3.57                                                               | 3.35                     | 3.37         | 3.87                                                               | 3.48                     | 3.54         | 4.85                                                               | 4.32                     | 4.18         |
| $U_{\text{iso}}$ of O3 ( $\text{\AA}^2$ ) | 0.053(2)                                                           | 0.012(2)                 | 0.011(2)     | 0.064(2)                                                           | 0.007(1)                 | 0.007(2)     | 0.080(2)                                                           | 0.009(2)                 | 0.010(2)     |

Table S2. Atomic coordinates, occupancy factors, and isotropic thermal displacement parameters obtained from the Rietveld refinements.

| $\text{CaBaZn}_2\text{Al}_2\text{O}_7$                             | $x$        | $y$        | $z$        | Occ.              | $U_{\text{iso}}$ ( $\text{\AA}^2$ ) |
|--------------------------------------------------------------------|------------|------------|------------|-------------------|-------------------------------------|
| Ca                                                                 | 2/3        | 1/3        | 0.8715(2)  | 1                 | 0.0112(6)                           |
| Ba                                                                 | 2/3        | 1/3        | 0.5        | 1                 | 0.0206(3)                           |
| Al1/Zn1                                                            | 0          | 0          | 0.4353(5)  | 0.942(4)/0.058(4) | 0.014(1)                            |
| Al2/Zn2                                                            | 0.17259(8) | 0.82741(8) | 0.6833(1)  | 0.353(4)/0.647(4) | 0.0133(4)                           |
| O1                                                                 | 0.5032(6)  | 0.4968(6)  | 0.7332(5)  | 1                 | 0.025(1)                            |
| O2                                                                 | 0          | 0          | 0.2614(9)  | 1                 | 0.023(2)                            |
| O3                                                                 | 0.1510(3)  | 0.8490(3)  | 0.4940(6)  | 1                 | 0.033(1)                            |
| $\text{CaBa}_{0.8}\text{Sr}_{0.2}\text{Zn}_2\text{Al}_2\text{O}_7$ | $x$        | $y$        | $z$        | Occ.              | $U_{\text{iso}}$ ( $\text{\AA}^2$ ) |
| Ca                                                                 | 2/3        | 1/3        | 0.8711(2)  | 1                 | 0.0056(6)                           |
| Ba/Sr                                                              | 2/3        | 1/3        | 0.5        | 0.8/0.2           | 0.0197(4)                           |
| Al1/Zn1                                                            | 0          | 0          | 0.4450(5)  | 0.926(4)/0.074(4) | 0.0132(9)                           |
| Al2/Zn2                                                            | 0.1692(7)  | 0.8261(8)  | 0.68950(9) | 0.358(4)/0.642(4) | 0.0132(4)                           |
| O1                                                                 | 0.503(3)   | 0.501(3)   | 0.7374(4)  | 1                 | 0.027(2)                            |
| O2                                                                 | 0          | 0          | 0.2725(8)  | 1                 | 0.016(2)                            |
| O3                                                                 | 0.2005(8)  | 0.8998(7)  | 0.5010(4)  | 1                 | 0.011(2)                            |

| $\text{CaBa}_{0.6}\text{Sr}_{0.4}\text{Zn}_2\text{Al}_2\text{O}_7$ | $x$        | $y$        | $z$        | Occ.              | $U_{\text{iso.}} (\text{\AA})$   |
|--------------------------------------------------------------------|------------|------------|------------|-------------------|----------------------------------|
| Ca                                                                 | 2/3        | 1/3        | 0.8783(2)  | 1                 | 0.0073(6)                        |
| Ba/Sr                                                              | 2/3        | 1/3        | 0.5        | 0.6/0.4           | 0.0243(4)                        |
| Al1/Zn1                                                            | 0          | 0          | 0.4394(5)  | 0.932(4)/0.068(4) | 0.0187(9)                        |
| Al2/Zn2                                                            | 0.1682(6)  | 0.8249(6)  | 0.6892(1)  | 0.356(4)/0.644(4) | 0.0135(4)                        |
| O1                                                                 | 0.506(2)   | 0.500(2)   | 0.7364(4)  | 1                 | 0.034(1)                         |
| O2                                                                 | 0          | 0          | 0.2754(8)  | 1                 | 0.027(2)                         |
| O3                                                                 | 0.2088(7)  | 0.9078(7)  | 0.4974(4)  | 1                 | 0.006(1)                         |
| $\text{CaBa}_{0.4}\text{Sr}_{0.6}\text{Zn}_2\text{Al}_2\text{O}_7$ | $x$        | $y$        | $z$        | Occ.              | $U_{\text{iso.}} (\text{\AA}^2)$ |
| Ca                                                                 | 2/3        | 1/3        | 0.8709(2)  | 1                 | 0.0056(7)                        |
| Ba/Sr                                                              | 2/3        | 1/3        | 0.5        | 0.4/0.6           | 0.0214(5)                        |
| Al1/Zn1                                                            | 0          | 0          | 0.4310(6)  | 0.940(4)/0.060(4) | 0.0150(9)                        |
| Al2/Zn2                                                            | 0.17246(9) | 0.82754(9) | 0.6835(2)  | 0.353(4)/0.647(4) | 0.0118(4)                        |
| O1                                                                 | 0.508(2)   | 0.505(2)   | 0.7295(5)  | 1                 | 0.041(2)                         |
| O2                                                                 | 0          | 0          | 0.2676(8)  | 1                 | 0.028(3)                         |
| O3                                                                 | 0.2142(7)  | 0.9142(7)  | 0.4930(5)  | 1                 | 0.010(2)                         |
| $\text{CaBa}_{0.2}\text{Sr}_{0.8}\text{Zn}_2\text{Al}_2\text{O}_7$ | $x$        | $y$        | $z$        | Occ.              | $U_{\text{iso.}} (\text{\AA}^2)$ |
| Ca                                                                 | 0.6700(5)  | 1.0082(8)  | 0.8949(2)  | 1                 | 0.0048(8)                        |
| Ba/Sr                                                              | 0.6661(3)  | 0.0007(3)  | 0.52210(9) | 0.8/0.2           | 0.0207(6)                        |
| Al11/Zn11                                                          | 0.997(1)   | 0.003(1)   | 0.9617(7)  | 0.929(6)/0.071(6) | 0.015(1)                         |
| Zn1/Al1                                                            | 0.1740(3)  | 1.0045(6)  | 0.7067(6)  | 0.74(1)/0.26(1)   | 0.009(1)                         |
| Zn2/Al2                                                            | 0.0906(3)  | 0.2549(6)  | 0.2128(4)  | 0.80(1)/0.20(1)   | 0.017(2)                         |
| Zn3/Al3                                                            | 0.9207(3)  | 0.2598(8)  | 0.6962(5)  | 0.45(1)/0.55(1)   | 0.011(2)                         |
| O2                                                                 | 1.005(2)   | 0.988(3)   | 0.2815(7)  | 1                 | 0.015(1)                         |
| O11                                                                | 0.487(1)   | 0.012(3)   | 0.246(1)   | 1                 | 0.015(1)                         |
| O12                                                                | 0.245(1)   | 0.792(2)   | 0.810(1)   | 1                 | 0.015(1)                         |
| O13                                                                | 0.734(1)   | 0.738(2)   | 0.227(2)   | 1                 | 0.015(1)                         |

|                                                    |           |           |            |                 |                                    |
|----------------------------------------------------|-----------|-----------|------------|-----------------|------------------------------------|
| O31                                                | 0.145(1)  | 0.917(2)  | 0.511(2)   | 1               | 0.015(1)                           |
| O32                                                | 0.104(1)  | 0.202(2)  | 1.026(2)   | 1               | 0.015(1)                           |
| O33                                                | 0.9653(9) | 0.260(2)  | 0.511(2)   | 1               | 0.015(1)                           |
| CaSrZn <sub>2</sub> Al <sub>2</sub> O <sub>7</sub> | <i>x</i>  | <i>y</i>  | <i>z</i>   | Occ.            | U <sub>iso</sub> (Å <sup>2</sup> ) |
| Ca                                                 | 0.6726(6) | 1.000(1)  | 0.8713 (3) | 1               | 0.013(1)                           |
| Sr                                                 | 0.6658(3) | 0.0044(5) | 0.5        | 1               | 0.018(1)                           |
| Al11/Zn11                                          | 0.004(1)  | 0.017(1)  | 0.935(2)   | 0.95(1)/0.05(1) | 0.010(2)                           |
| Zn1/Al1                                            | 0.1758(3) | 0.9925(7) | 0.6840(7)  | 0.87(1)/0.13(1) | 0.07(1)                            |
| Zn2/Al2                                            | 0.0893(3) | 0.2541(8) | 0.1903(7)  | 0.85(1)/0.15(1) | 0.003(1)                           |
| Zn3/Al3                                            | 0.9238(5) | 0.261(1)  | 0.6680(8)  | 0.22(1)/0.78(1) | 0.009(3)                           |
| O2                                                 | 1.003(2)  | 0.969(3)  | 0.257(1)   | 1               | 0.008(2)                           |
| O11                                                | 0.487(1)  | 0.006(4)  | 0.231(2)   | 1               | 0.008(2)                           |
| O12                                                | 0.258(2)  | 0.784(3)  | 0.792(1)   | 1               | 0.008(2)                           |
| O13                                                | 0.741(1)  | 0.721(2)  | 0.178(2)   | 1               | 0.008(2)                           |
| O31                                                | 0.146(1)  | 0.902(2)  | 0.482(2)   | 1               | 0.008(2)                           |
| O32                                                | 0.116(1)  | 0.185(2)  | 1.00(2)    | 1               | 0.008(2)                           |
| O33                                                | 0.972(1)  | 0.249(2)  | 0.509(2)   | 1               | 0.008(2)                           |

Table S3 Selected bond lengths obtained from Rietveld refinements for CaBa<sub>1-x</sub>Sr<sub>x</sub>Zn<sub>2</sub>Al<sub>2</sub>O<sub>7</sub> (*x* = 0, 0.2, 0.4, 0.6).

| CaBaZn <sub>2</sub> Al <sub>2</sub> O <sub>7</sub> |            |           |            |           |            |
|----------------------------------------------------|------------|-----------|------------|-----------|------------|
| Bond                                               | Length (Å) | Bond      | Length (Å) | Bond      | Length (Å) |
| Ca-O1 × 3                                          | 2.259(6)   | Ba-O1 × 3 | 3.254(6)   | T2-O1 × 2 | 1.872(4)   |
| Ca-O3 × 3                                          | 2.337(4)   | <Ba-O>    | 3.125(3)   | T2-O2     | 2.038(4)   |
| <Ca-O>                                             | 2.298(6)   | T1-O2     | 1.75(1)    | T2-O3     | 1.913(6)   |
| Ba-O1 × 3                                          | 2.941(6)   | T1-O3 × 3 | 1.748(4)   | <T2-O>    | 1.924(4)   |

Ba-O3 × 6      3.15322(9)      <T1-O>      1.749(6)

---

CaBa<sub>0.8</sub>Sr<sub>0.2</sub>Zn<sub>2</sub>Al<sub>2</sub>O<sub>7</sub>

---

| Bond      | Length (Å) | Bond      | Length (Å) | Bond   | Length (Å) |
|-----------|------------|-----------|------------|--------|------------|
| Ca-O1 × 3 | 2.283(6)   | Ba-O3 × 3 | 3.461(3)   | T2-O1  | 1.842(15)  |
| Ca-O3 × 3 | 2.361(6)   | <Ba-O>    | 3.120(2)   | T2-O1  | 1.876(15)  |
| <Ca-O>    | 2.322(6)   | T1-O2     | 1.698(9)   | T2-O2  | 2.043(6)   |
| Ba-O3 × 3 | 2.836(3)   | T1-O3 × 3 | 1.770(6)   | T2-O3  | 1.929(6)   |
| Ba-O1 × 3 | 2.931(1)   | <T1-O>    | 1.752(7)   | <T2-O> | 1.923(11)  |
| Ba-O1 × 3 | 3.253(1)   |           |            |        |            |

---

CaBa<sub>0.6</sub>Sr<sub>0.4</sub>Zn<sub>2</sub>Al<sub>2</sub>O<sub>7</sub>

---

| Bond      | Length (Å) | Bond      | Length (Å) | Bond   | Length (Å) |
|-----------|------------|-----------|------------|--------|------------|
| Ca-O1 × 3 | 2.27(1)    | Ba-O3 × 3 | 3.507(3)   | T2-O1  | 1.861(14)  |
| Ca-O3 × 3 | 2.343(5)   | <Ba-O>    | 3.112(7)   | T2-O1  | 1.837(13)  |
| <Ca-O>    | 2.307(8)   | T1-O2     | 1.635(9)   | T2-O2  | 2.054(5)   |
| Ba-O3 × 3 | 2.780(3)   | T1-O3 × 3 | 1.772(5)   | T2-O3  | 1.965 (6)  |
| Ba-O1 × 3 | 2.89(1)    | <T1-O>    | 1.738(6)   | <T2-O> | 1.929(9)   |
| Ba-O1 × 3 | 3.27(1)    |           |            |        |            |

---

CaBa<sub>0.4</sub>Sr<sub>0.6</sub>Zn<sub>2</sub>Al<sub>2</sub>O<sub>7</sub>

---

| Bond      | Length (Å) | Bond      | Length (Å) | Bond   | Length (Å) |
|-----------|------------|-----------|------------|--------|------------|
| Ca-O1 × 3 | 2.28(1)    | Ba-O3 × 3 | 3.539(3)   | T2-O1  | 1.844(12)  |
| Ca-O3 × 3 | 2.364(5)   | <Ba-O>    | 3.107(7)   | T2-O1  | 1.853(13)  |
| <Ca-O>    | 2.307(8)   | T1-O2     | 1.624(9)   | T2-O2  | 2.044(5)   |
| Ba-O3 × 3 | 2.737(3)   | T1-O3 × 3 | 1.785(6)   | T2-O3  | 1.947(5)   |
| Ba-O1 × 3 | 2.90(1)    | <T1-O>    | 1.745(7)   | <T2-O> | 1.922(9)   |
| Ba-O1 × 3 | 3.25(1)    |           |            |        |            |

---

CaBa<sub>0.2</sub>Sr<sub>0.8</sub>Zn<sub>2</sub>Al<sub>2</sub>O<sub>7</sub>

---

| Bond | Length (Å) | Bond | Length (Å) | Bond | Length (Å) |
|------|------------|------|------------|------|------------|
|------|------------|------|------------|------|------------|

|         |           |          |           |         |           |
|---------|-----------|----------|-----------|---------|-----------|
| Ca-O11  | 2.257(13) | Sr-O33   | 2.644(11) | Zn1-O31 | 2.039(18) |
| Ca-O12  | 2.208(13) | Sr-O32   | 3.473(13) | Zn1-O2  | 2.076(18) |
| Ca-O13  | 2.429(14) | Sr-O13   | 3.436(14) | <Zn1-O> | 1.965(16) |
| Ca-O31  | 2.357(15) | Sr-O12   | 3.482(11) | Zn2-O11 | 1.867(17) |
| Ca-O32  | 2.339(14) | < Sr-O>  | 3.00(1)   | Zn2-O32 | 1.884(16) |
| Ca-O33  | 2.424(14) | Al11-O31 | 1.696(17) | Zn2-O2  | 2.027(19) |
| < Ca-O> | 2.34(4)   | Al11-O33 | 1.758(15) | Zn2-O12 | 2.038(15) |
| Sr-O11  | 2.768(13) | Al11-O2  | 1.785(10) | <Zn2-O> | 1.954(17) |
| Sr-O12  | 2.656(11) | Al11-O32 | 1.812(17) | Zn3-O13 | 1.713(15) |
| Sr-O11  | 3.357(13) | <Al11-O> | 1.763(14) | Zn3-O33 | 1.895(18) |
| Sr-O4   | 2.729(14) | Zn1-O12  | 1.844(13) | Zn3-O11 | 1.926(18) |
| Sr-O31  | 2.620(10) | Zn1-O13  | 1.900(13) | Zn3-O2  | 1.937(19) |
| Sr-O32  | 2.796(13) |          |           | <Zn3-O> | 1.868(18) |

---

CaSrZn<sub>2</sub>Al<sub>2</sub>O<sub>7</sub>

---

| Bond   | Length (Å) | Bond     | Length (Å) | Bond    | Length (Å) |
|--------|------------|----------|------------|---------|------------|
| Ca-O11 | 2.217(17)  | Sr-O11   | 2.814(16)  | <Zn1-O> | 2.022(18)  |
| Ca-O12 | 2.144(18)  | Sr-O11   | 3.291(16)  | Zn2-O32 | 1.94(2)    |
| Ca-O13 | 2.528(19)  | <Sr-O>   | 2.702(15)  | Zn2-O2  | 2.109(18)  |
| Ca-O31 | 2.331(16)  | Al11-O31 | 1.77(2)    | Zn2-O12 | 1.943(19)  |
| Ca-O32 | 2.421(17)  | Al11-O33 | 1.827(18)  | Zn2-O11 | 1.90(2)    |
| Ca-O33 | 2.602(16)  | Al11-O2  | 1.763(19)  | <Zn2-O> | 1.973(19)  |
| <Ca-O> | 2.374(17)  | Al11-O32 | 1.73(2)    | Zn3-O13 | 1.811(16)  |
| Sr-O13 | 2.432(19)  | <Al11-O> | 1.773      | Zn3-O33 | 1.65(2)    |
| Sr-O31 | 2.548(12)  | Zn1-O12  | 1.902(17)  | Zn3-O11 | 1.91(2)    |
| Sr-O12 | 2.578(15)  | Zn1-O13  | 2.002(15)  | Zn3-O2  | 1.854(19)  |
| Sr-O33 | 2.603(13)  | Zn1-O31  | 2.095(19)  | <Zn3-O> | 1.806(19)  |
| Sr-O32 | 2.650(15)  | Zn1-O2   | 2.09(2)    |         |            |

---

Table S4. The lattice parameters for  $\text{CaBa}_{1-x}\text{Sr}_x\text{Zn}_2\text{Al}_2\text{O}_7$  ( $x = 0, 0.2, 0.4, 0.6, 0.8, \text{ and } 1.0$ ) obtained from Rietveld refinements and  $\text{Ca}_{0.98}\text{Eu}_{0.02}\text{Ba}_{1-y}\text{Sr}_y\text{Zn}_{2.02}\text{Al}_{1.98}\text{O}_7$  ( $y = 0, 0.4, 0.8$ ) obtained from Le-bail fitting.

|           | $a$ (Å)     | $b$ (Å)    | $c$ (Å)     | $V$ (Å <sup>3</sup> ) |
|-----------|-------------|------------|-------------|-----------------------|
| $x = 0$   | 6.29603(2)  | 6.29603(2) | 10.02682(5) | 344.213(3)            |
| $x = 0.2$ | 6.28600(6)  | 6.28600(6) | 10.0036(1)  | 342.324(8)            |
| $x = 0.4$ | 6.27357(5)  | 6.27357(5) | 9.9710(1)   | 339.791(6)            |
| $x = 0.6$ | 6.26264(4)  | 6.26264(4) | 9.93947(7)  | 337.605(5)            |
| $x = 0.8$ | 10.8487(1)  | 6.23985(7) | 9.8979(1)   | 670.03(1)             |
| $x = 1.0$ | 10.84872(9) | 6.22609(5) | 9.86609 (9) | 666.40(1)             |
| $y = 0$   | 6.2960      | 6.2960     | 10.0268     | 344.2130              |
| $y = 0.4$ | 6.2767      | 6.2767     | 9.9815      | 340.5532              |
| $y = 0.8$ | 10.8421     | 6.2388     | 9.8984      | 669.5441              |

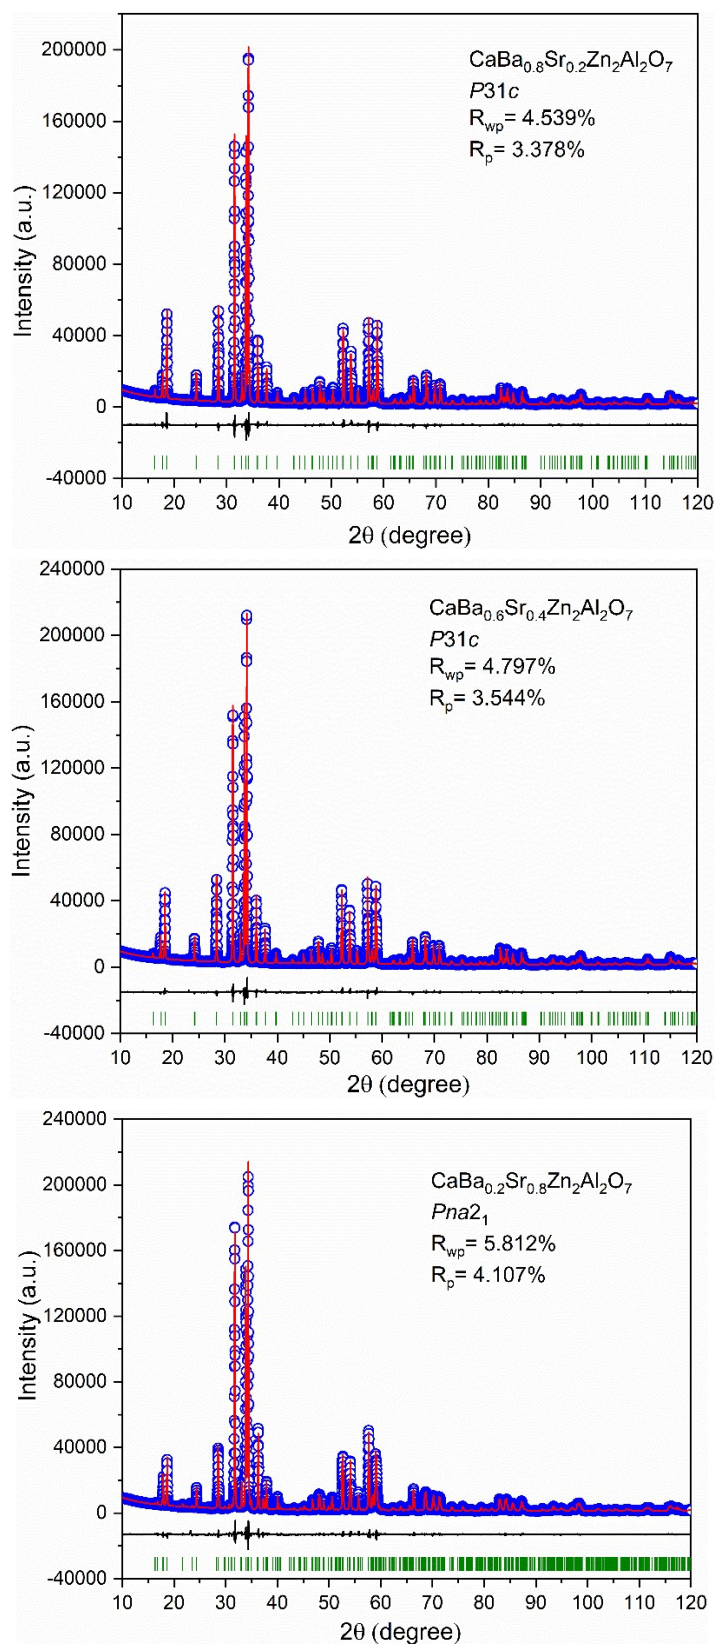

Fig. S1 Rietveld refinement patterns for CaBa<sub>1-x</sub>Sr<sub>x</sub>Zn<sub>2</sub>Al<sub>2</sub>O<sub>7</sub> ( $x = 0.2, 0.4$  and  $0.8$ ).



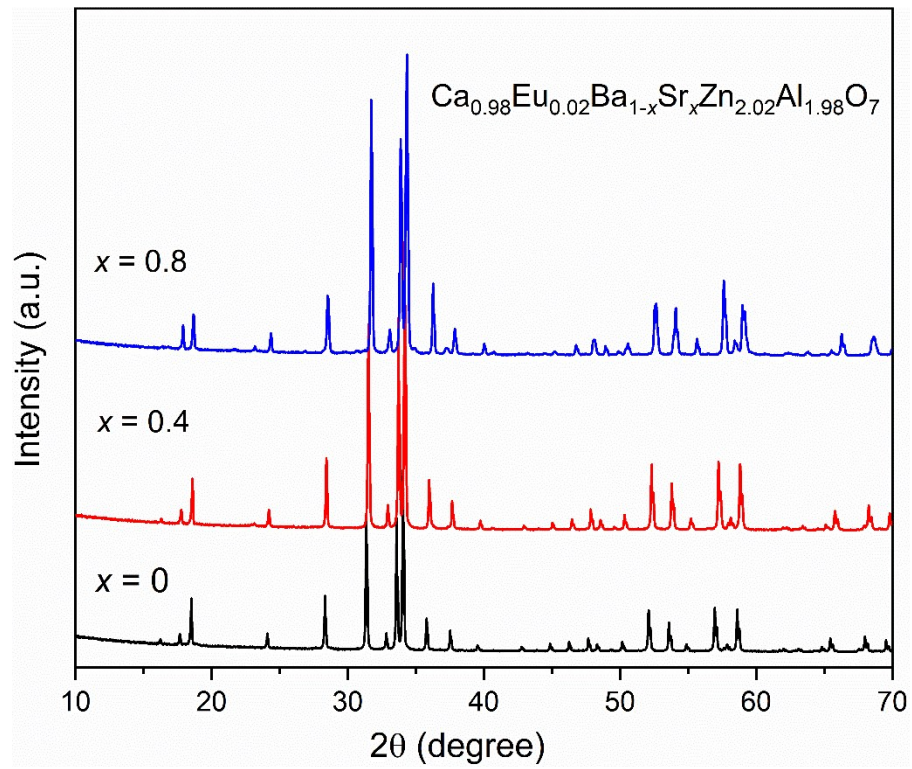

Fig. S2 XRD patterns for  $\text{Ca}_{0.98}\text{Eu}_{0.02}\text{Ba}_{1-x}\text{Sr}_x\text{Zn}_{2.02}\text{Al}_{1.98}\text{O}_7$  ( $x = 0, 0.4, 0.8$ ).

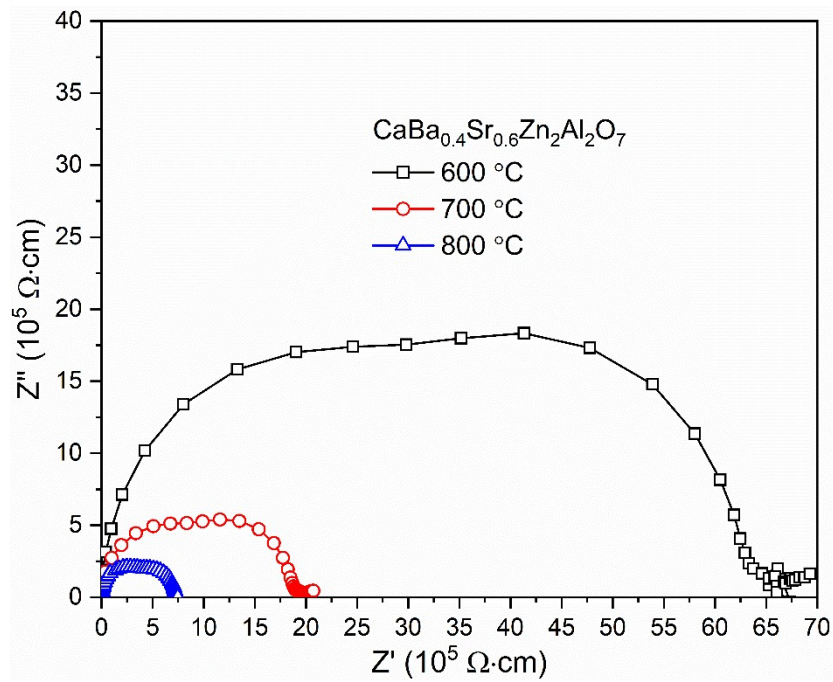

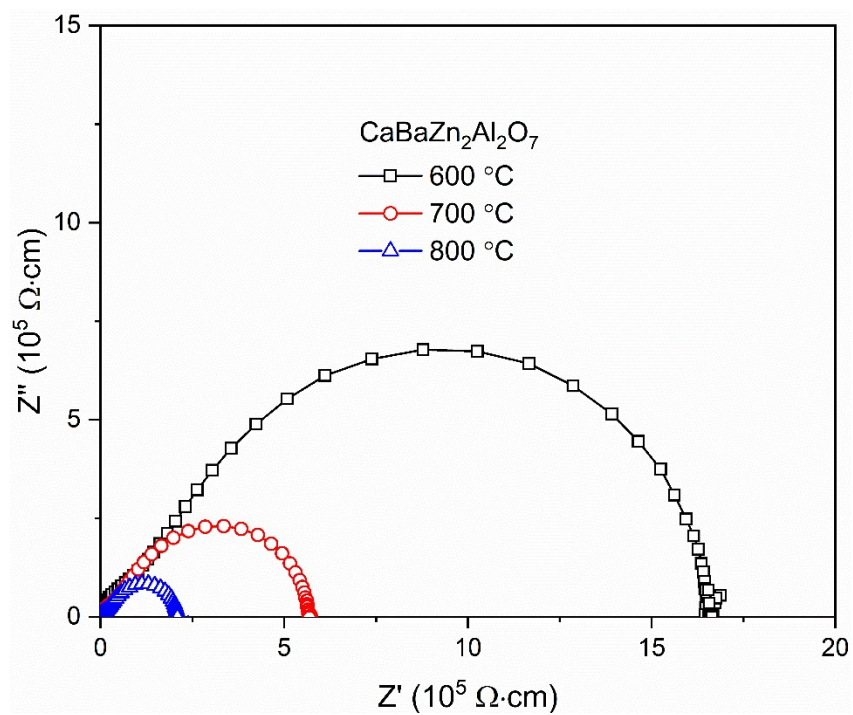

Fig. S3 Complex *ac* impedance spectra for  $\text{CaBa}_{0.4}\text{Sr}_{0.6}\text{ZnAlO}_7$  and  $\text{CaBaZnAlO}_7$  measured in air at 600, 700, and 800 °C.
